# Supplementary material for: Ring-opening crosslinking PEGylation of an AIE epoxy monomer towards biocompatible fluorescent nanoparticles
Source: Royal Society of Chemistry journal article supplement (doi:10.1039/c6tb02841a), 2016-01-01
Supplement: c6tb02841a1.pdf [file c6tb02841a1.pdf]

## Supporting information

# Ring-opening crosslinking PEGylation of an AIE epoxy monomer towards biocompatible fluorescent nanoparticles

Chunping Ma,<sup>a</sup> Xiqi Zhang,<sup>\*b,c</sup> Gaoyi Xie,<sup>d</sup> Liutao Yang,<sup>a</sup> Yang Li,<sup>a</sup> Hongliang Liu,<sup>b</sup> Ke Wang<sup>\*e</sup>  
and Yen Wei<sup>\*c</sup>

<sup>a</sup> College of Materials & Metallurgical Engineering, Guizhou Institute of Technology, Guiyang, 550003, P. R. China.

<sup>b</sup> Laboratory of Bio-Inspired Smart Interface Science, Technical Institute of Physics and Chemistry, Chinese Academy of Sciences, Beijing, 100190, P. R. China.

<sup>c</sup> Department of Chemistry and the Tsinghua Center for Frontier Polymer Research, Tsinghua University, Beijing, 100084, P. R. China.

<sup>d</sup> National Engineering Research Center for Compounding and Modification of Polymer materials, R&D Department, Guiyang, 550014, Guizhou, P. R. China.

<sup>e</sup> School of Pharmaceutical Sciences, Sun Yat-sen University, Guangzhou, 510006, P. R. China.

E-mail: [xqzhang@mail.ipc.ac.cn](mailto:xqzhang@mail.ipc.ac.cn) (X. Zhang); [wangke007@iccas.ac.cn](mailto:wangke007@iccas.ac.cn) (K. Wang); [weiyen@tsinghua.edu.cn](mailto:weiyen@tsinghua.edu.cn) (Y. Wei).

## Result

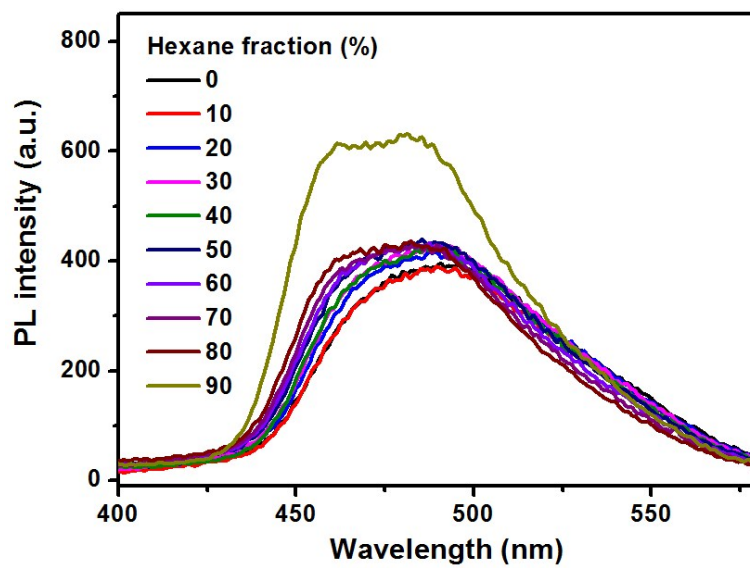

**Fig. S1** Demonstration of AIE property of EP3, showing that PL intensity increases in a DMSO/hexane medium with the increasing hexane fraction.
